# ANESTHESIOLOGY

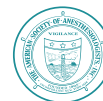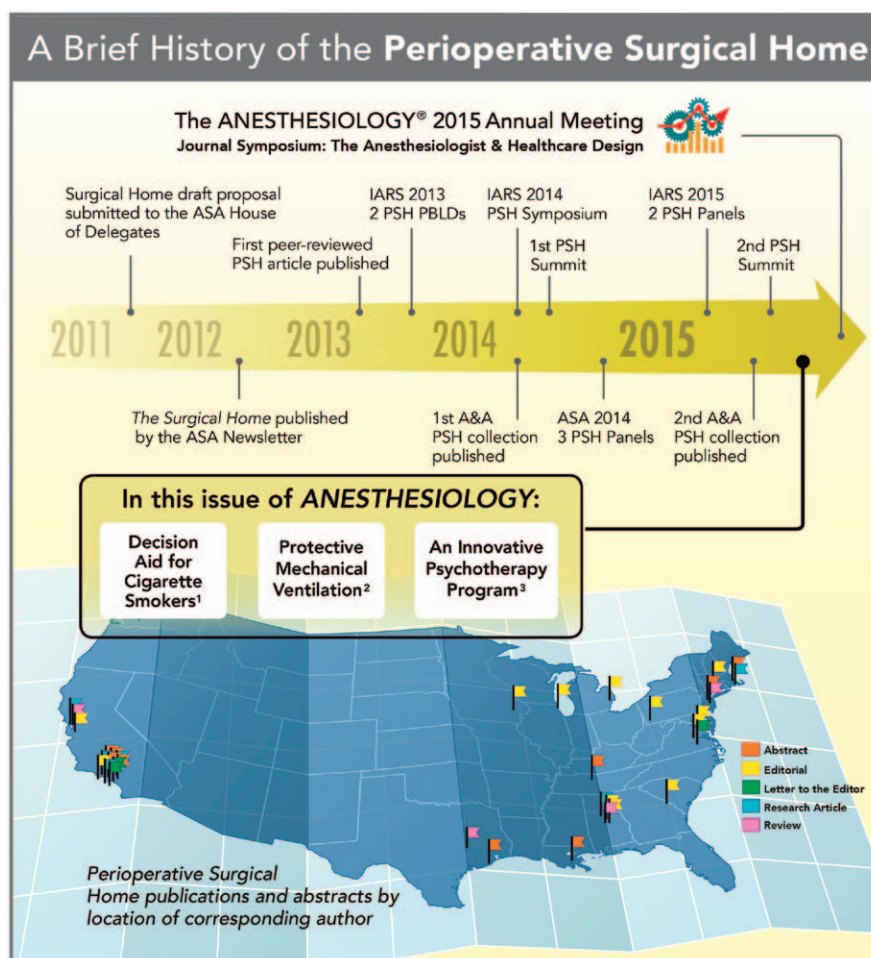

We searched PubMed using the phrase “perioperative surgical home” (PSH), classifying manuscripts as either research articles, reviews, letters to the editor, or editorials. PSH abstracts were identified from American Society of Anesthesiologists (ASA) Annual Meetings using the ASA website,\* and from International Anesthesia Research Society (IARS) Annual Meetings using the final meeting programs and abstract supplements. For each identified manuscript and abstract, the zip code of the corresponding author’s institution was mapped to a longitude-latitude. The corresponding points were plotted on a map of the United States (package zipcode; R Software Foundation, Austria) using a jitter function to reduce overplotting; locations are approximate. The time line for PSH events was developed using the ASA PSH website.† A&A = *Anesthesia & Analgesia*; PBLD = Problem-Based Learning Discussion.

Infographic created by Jonathan P. Wanderer, Vanderbilt University School of Medicine, and James P. Rathmell, Massachusetts General Hospital/Harvard Medical School. Illustration by Annemarie Johnson, Vivo Visuals. Dr. Wanderer is funded by the Foundation for Anesthesia Education and Research, Rochester, Minnesota, and Anesthesia Quality Institute’s Mentored Research Training Grant – Health Services Research, Schaumburg, Illinois. Address correspondence to Dr. Wanderer: jon.wanderer@vanderbilt.edu.

1. Warner DO, LeBlanc A, Kadimpati S, *et al*: Decision aid for cigarette smokers scheduled for elective surgery. *ANESTHESIOLOGY* 2015; 123:18–28
2. Serpa Neto A, Hemmes SNT, Barbas CSV, *et al*: Protective *versus* conventional ventilation for surgery: A systematic review and individual patient data meta-analysis. *ANESTHESIOLOGY* 2015; 123:66–78
3. Kerper LF, Spies CD, Salz A-L, *et al*: Effects of an innovative psychotherapy program for surgical patients: Bridging intervention in anesthesia—A randomized controlled trial. *ANESTHESIOLOGY* 2015; 123:148–59

\* Available at: <http://www.asaabstracts.com/strands/asaabstracts/search.htm>. Accessed May 1, 2015.

† Available at: <https://www.asahq.org/psb>. Accessed May 1, 2015.
